# Supplementary material for: Sustainability of a mobile phone application-based data reporting system in Myanmar’s malaria elimination program: a qualitative study
Source: BMC Med Inform Decis Mak. 2021 Oct 18;21:285. doi: 10.1186/s12911-021-01646-z (PMC8521268; doi:10.1186/s12911-021-01646-z)
Supplement: Supplementary file 1 — Additional file 1. Standardized carbonless malaria register. [file 12911_2021_1646_MOESM1_ESM.pdf]

[illegible]

Signature:  
Name:  
Village:  
Organization:
